# Supplementary material for: Design of SHG materials with mid-infrared transparency based on genetic engineering for Ba2BiInA5 (A = Se, Te)
Source: Royal Society of Chemistry journal article supplement (doi:10.1039/c2jm34775j), 2012-01-01
Supplement: c2jm34775j.pdf [file c2jm34775j.pdf]

# Designs of SHG materials with mid-infrared transparency based on genetic engineering for $\text{Ba}_2\text{BiInA}_5$ ( $\text{A} = \text{Se}, \text{Te}$ )

Chen-Sheng Lin, Zhong-Zhen Luo, Wen-Dan Cheng\*, Hao Zhang, Wei-Long Zhang

*State Key Laboratory of Structural Chemistry, Fujian Institute of Research on the Structure of Mater, the Chinese Academy of Sciences, Fuzhou, Fujian 350002, China*

## Electronic Supplementary Information

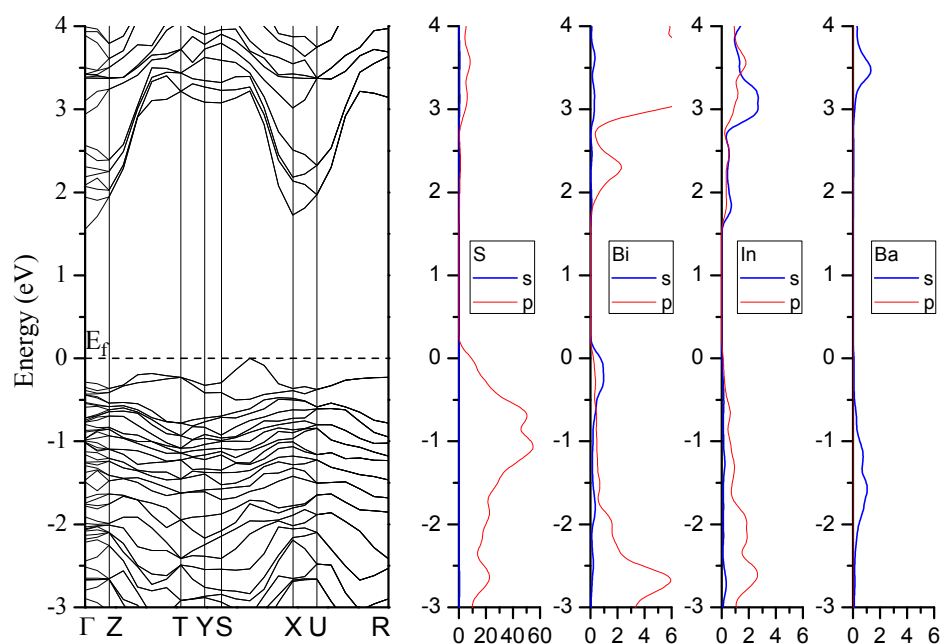

**Fig. S1a** Energy band structure and projected density of state for  $\text{Ba}_2\text{BiInS}_5$ .

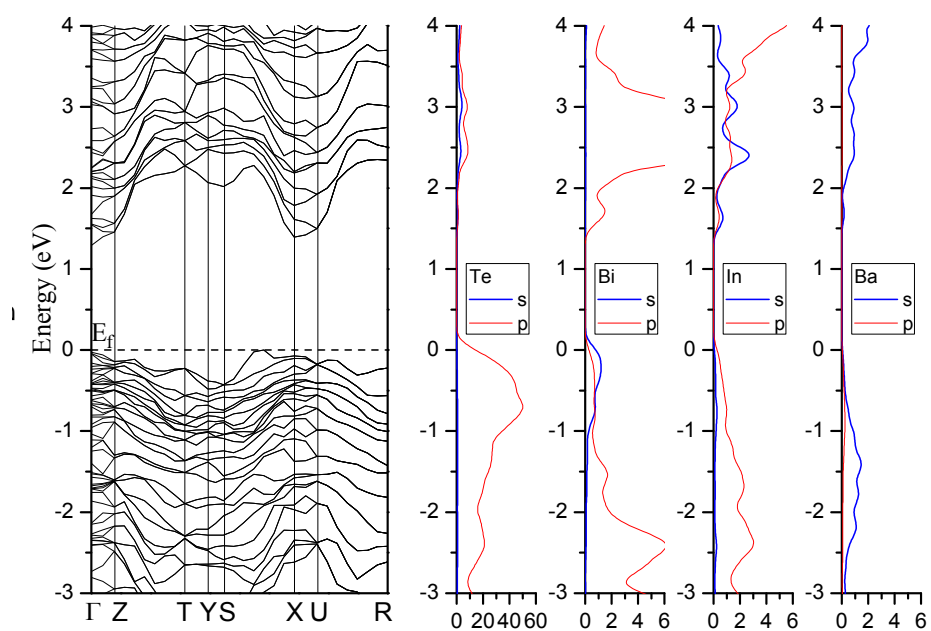

**Fig. S1b** Energy band structure and projected density of state for  $\text{Ba}_2\text{BiInS}_5$ .

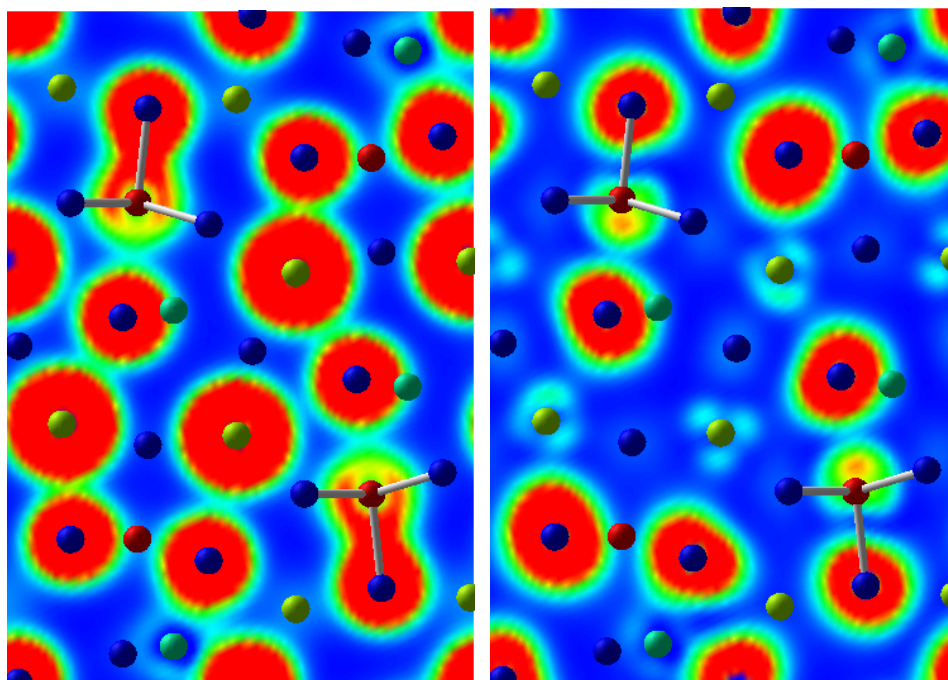

**Fig. S2a** The PED maps from -1.0 eV to the Fermi level (left), and from -10.0 to -13.0 eV (right); the electron density is represented from blue (0.0 e/Å<sup>3</sup>) to red (0.08 e/Å<sup>3</sup>) for compound  $\text{Ba}_2\text{BiInS}_5$ .

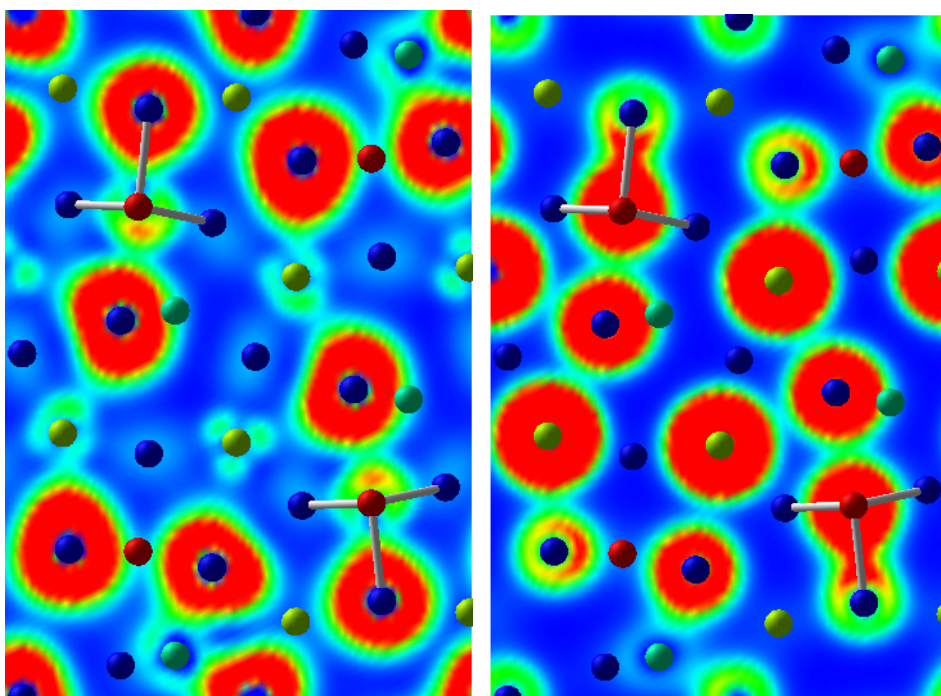

**Fig. S2b** The PED maps from -1.0 eV to the Fermi level (left), and from -10.0 to -13.0 eV (right); the electron density is represented from blue ( $0.0 \text{ e}/\text{\AA}^3$ ) to red ( $0.08 \text{ e}/\text{\AA}^3$ ) for compound  $\text{Ba}_2\text{BiInTe}_5$ .

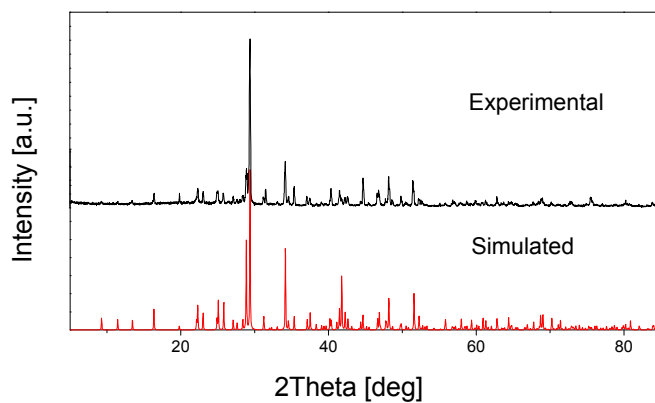

**Fig. S3** Experimented and simulated X-ray diffraction patterns for polycrystalline  $\text{Ba}_2\text{BiInSe}_5$  (The radiation wavelength of the X-ray is  $\lambda = 1.5418 \text{ \AA}$ ).

**Table S1.** Atomic coordinates and equivalent isotropic displacement parameters ( $\text{\AA}$ ) for compound  $\text{Ba}_2\text{BiInSe}_5$ .

| Atom | x | y | z | $U_{\text{eq}}^a$ |
|------|---|---|---|-------------------|
|------|---|---|---|-------------------|

|       |         |           |           |          |
|-------|---------|-----------|-----------|----------|
| Ba(1) | -1.0000 | 0.6284(1) | 0.5204(1) | 0.014(1) |
| Ba(2) | -1.0000 | 0.3872(1) | 0.6447(1) | 0.013(1) |
| Bi(1) | 0       | 0.2820(1) | 0.3085(1) | 0.016(1) |
| In(1) | -0.5000 | 0.4409(1) | 0.3873(1) | 0.013(1) |
| Se(1) | 0       | 0.1413(1) | 0.3302(1) | 0.013(1) |
| Se(2) | -0.5000 | 0.3124(1) | 0.4657(1) | 0.015(1) |
| Se(3) | -0.5000 | 0.2837(1) | 0.1632(2) | 0.014(1) |
| Se(4) | -0.5000 | 0.5035(1) | 0.5573(2) | 0.012(1) |
| Se(8) | 0       | 0.4556(1) | 0.2772(1) | 0.014(1) |

**Table S2.** Selected bond lengths (Å) for compound Ba<sub>2</sub>BiInSe<sub>5</sub>.

|               | distance |               | distance |
|---------------|----------|---------------|----------|
| Ba(1)-Se(1)#9 | 3.321(2) | Bi(1)-Se(1)   | 2.706(3) |
| Ba(1)-Se(3)#6 | 3.324(2) | Bi(1)-Se(3)#1 | 2.890(2) |
| Ba(1)-Se(8)#6 | 3.746(3) | Bi(1)-Se(2)   | 3.051(2) |
| Ba(2)-Se(3)#3 | 3.276(4) | In(1)-Se(8)#4 | 2.620(2) |
| Ba(2)-Se(1)#5 | 3.310(2) | In(1)-Se(8)   | 2.620(2) |
| Ba(2)-Se(2)   | 3.507(2) | In(1)-Se(2)   | 2.665(3) |

Symmetry transformations used to generate equivalent atoms:

#1  $-x+1/2, -y-1/2, -z$ ; #3  $x-1/2, y-1/2, z$ ; #4  $x-1/2, y+1/2, z$ ;

#5  $-x+1/2, -y+1/2, -z+1$ ; #6  $-x+1/2, -y-1/2, -z+1$ ; #9  $x, y-1, z$
